# Supplementary material for: Halogen–halogen interactions and halogen bonding in thiacalixarene systems
Source: Royal Society of Chemistry journal article supplement (doi:10.1039/c3ce42535e), 2014-01-01
Supplement: c3ce42535e1.pdf [file c3ce42535e1.pdf]

Supporting Information

**Halogen–halogen interactions and halogen bonding in  
thiacalixarene systems**

**Manabu Yamada<sup>\*,a</sup>, Ryo Kanazawa<sup>b</sup>, and Fumio Hamada<sup>\*,c</sup>**

<sup>a</sup> *Center for Geo-Environmental Science (CGES), Graduate School of Engineering and Resource  
Science, Akita University, 1-1 Tegatagakuen-machi, Akita 010-8502*

<sup>b</sup> *Department of Life Science, Faculty of Engineering and Resource Science, Akita University, 1-1  
Tegatagakuen-machi, Akita 010-8502, Japan*

<sup>c</sup> *Department of Applied Chemistry for Environments, Graduate School of Engineering and Resource  
Science, Akita University, 1-1 Tegatagakuen-machi, Akita 010-8502, Japan*

\* Corresponding Author: myamada@gipc.akita-u.ac.jp; Fax: +81 18 889 3068; Tel: +81 18 889 3068.

\* Corresponding Author: hamada@gipc.akita-u.ac.jp; Fax: +81 18 889 2440; Tel: +81 18 889 2440.

# Contents

## Supporting figures

**Supplementary Figure S1** Schematic representations of Type I, Type II, and X<sub>3</sub> synthon halogen-halogen contacts.

**Supplementary Figure S2** A comparison of each angle in the molecular structure of **2**.

**Supplementary Figure S3** The ORTEP diagram of the asymmetric unit of crystal **2** with thermal ellipsoids at 50% probability.

**Supplementary Figure S4** The intermolecular S- $\pi$  interaction between the linking sulfur atom of thiacalixarene molecule and aromatic moiety of thiacalixarene molecule in crystals of **2**.

**Supplementary Figure S5** Stick diagram showing hydrogen bonding (red dotted lines) and CH $\cdots$ I interactions (light-blue dotted lines) in crystal structure of **2**, viewed along the [011] plane.

**Supplementary Figure S6** The ORTEP diagram of the asymmetric unit of crystal **3** with thermal ellipsoids at 50% probability.

**Supplementary Figure S7** A comparison of each angle in the molecular structure of **3**.

**Supplementary Figure S8** Stick diagram showing S- $\pi$  interactions (blue dotted lines) in the crystal structure of **3**.

**Supplementary Figure S9** The intermolecular S- $\pi$  interaction between the linking sulfur atom of thiacalixarene molecule and aromatic moiety of thiacalixarene molecule in crystals of **3**.

**Supplementary Figure S10** Stick diagram showing O $\cdots$ I halogen bonding (black dotted lines) in crystal structure of **3**.

**Supplementary Figure S11** Stick diagram showing C-H $\cdots$ I halogen bonding (orange dotted lines) in crystal structure of **3**, viewed along the [101] plane.

## Supporting figures

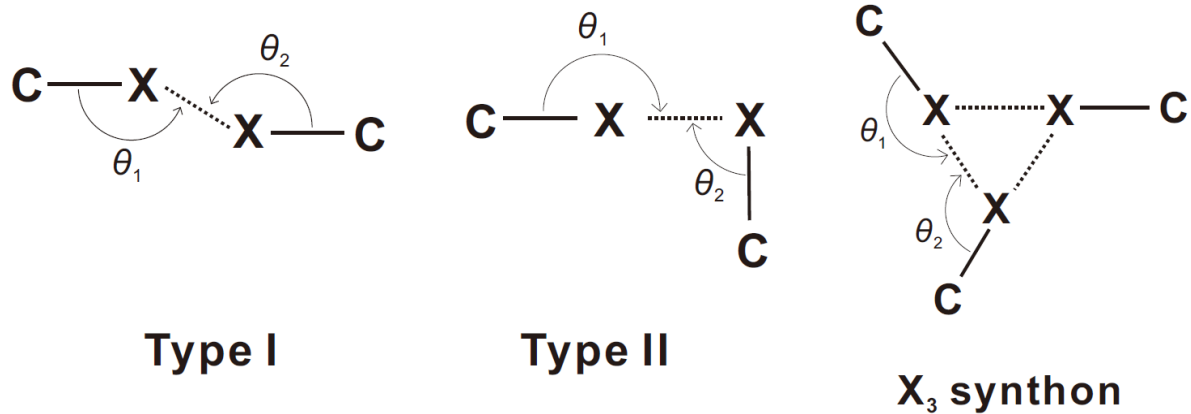

**Supplementary Figure S1** Schematic representations of Type I, Type II, and X<sub>3</sub> synthon halogen-halogen contacts. The angles: Type I ( $\theta_1=\theta_2=140-180^\circ$ ) and Type II ( $\theta_1=150-180^\circ$ ,  $\theta_2=90-120^\circ$ ). The X<sub>3</sub> synthon is a trigonal array of halogen atoms with attractive electrophile-nucleophile Type II contacts.

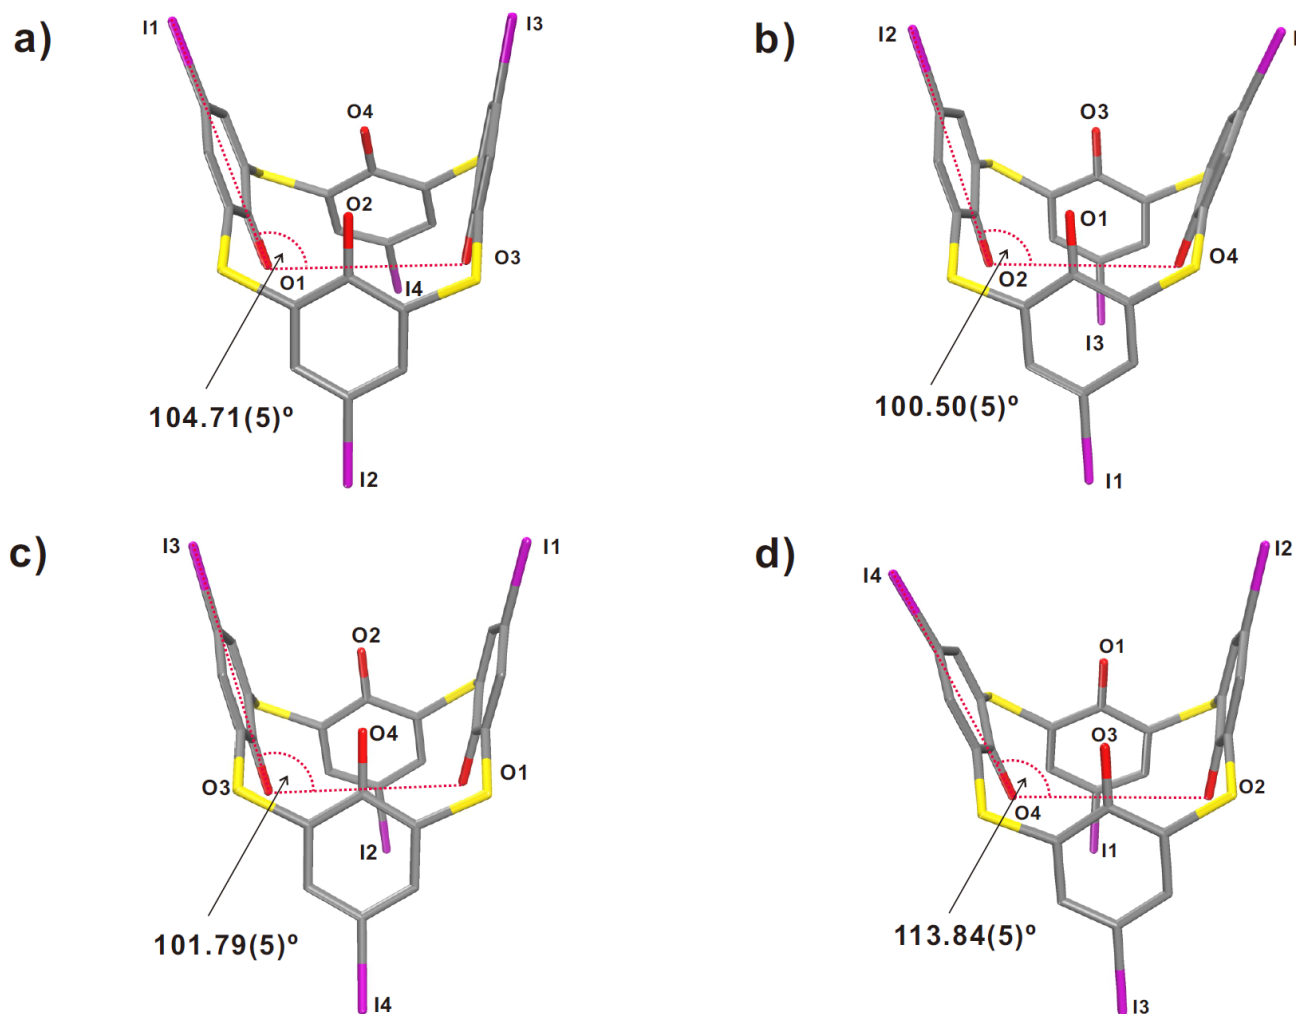

**Supplementary Figure S2** A comparison of each angle in the molecular structure of **2**. In a)–d) hydrogen atoms and the propyl groups have been removed for clarity. I = purple, S = yellow, O = red, C = gray. Selected bond angles: a) I(1)–O(1)–O(3)  $104.71(5)^\circ$ , b) I(2)–O(2)–O(4)  $100.50(5)^\circ$ , c) I(3)–O(3)–O(1)  $101.79(5)^\circ$ , d) I(4)–O(4)–O(2)  $113.84(5)^\circ$ .

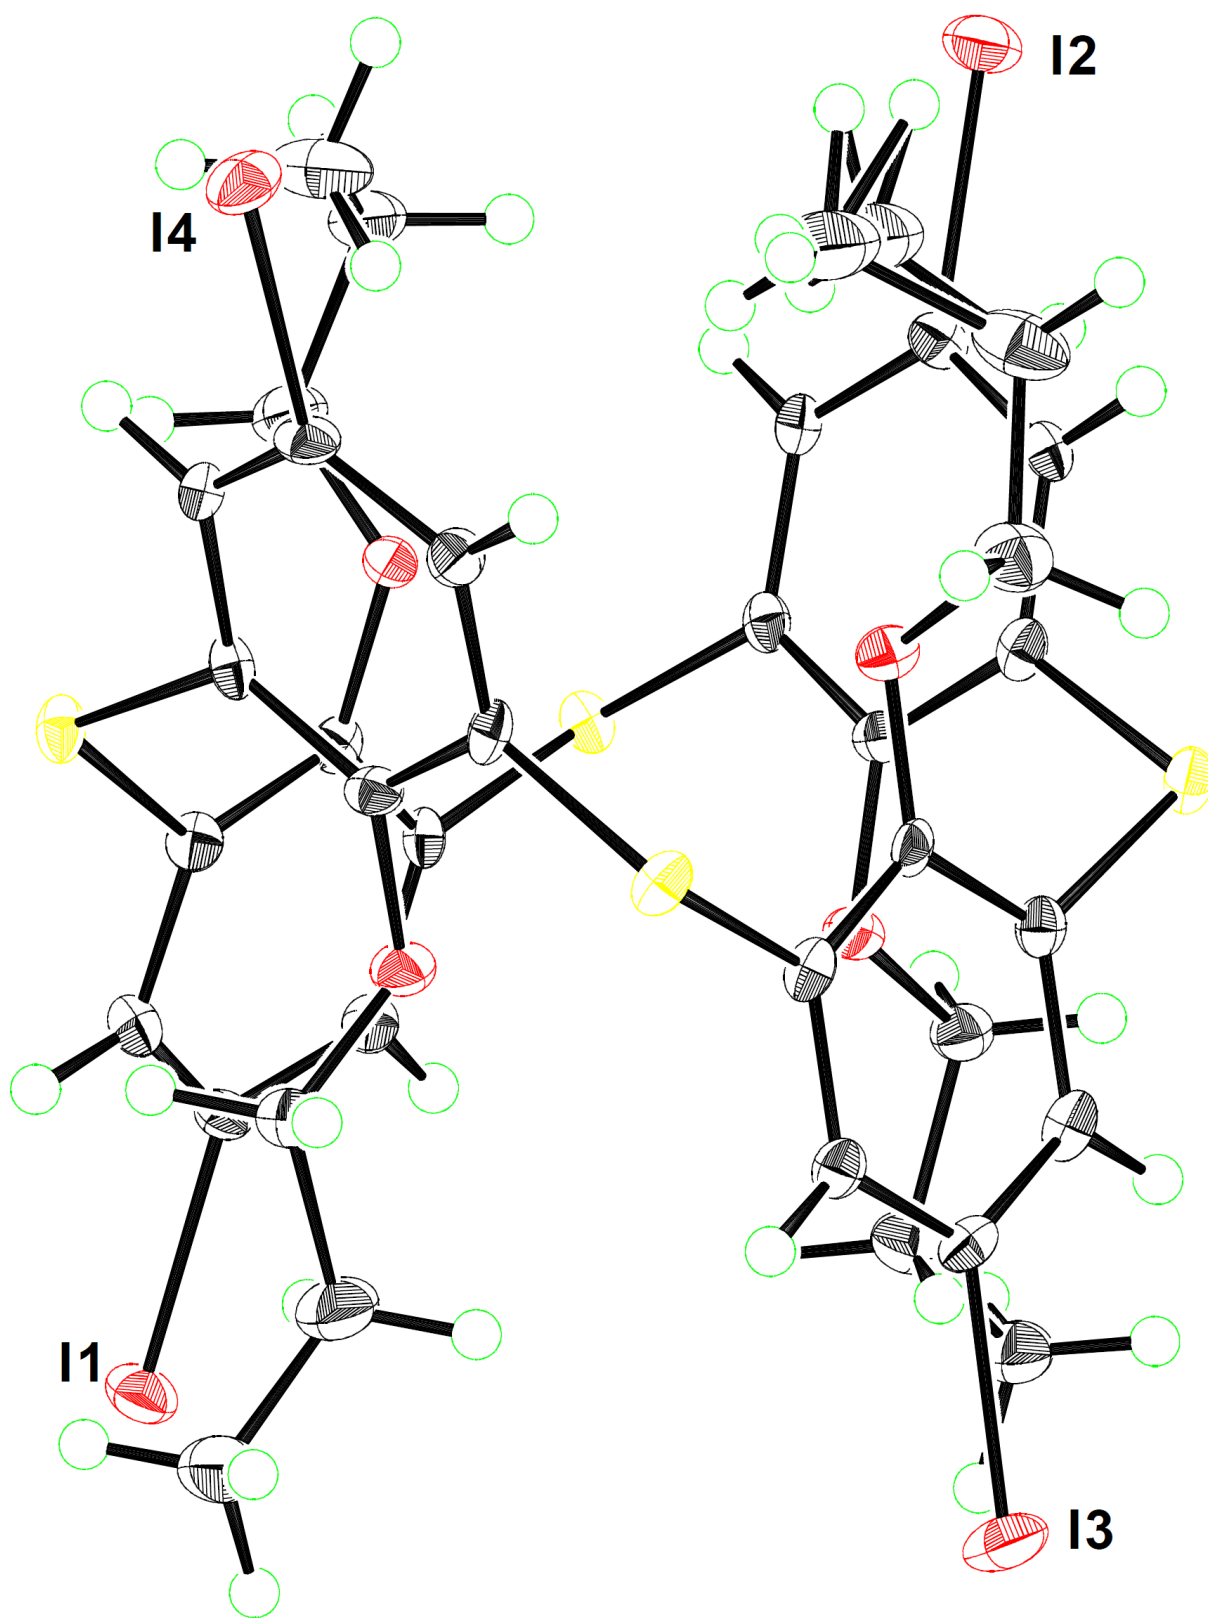

**Supplementary Figure S3** The ORTEP diagram of the asymmetric unit of crystal 2 with thermal ellipsoids at 50% probability.

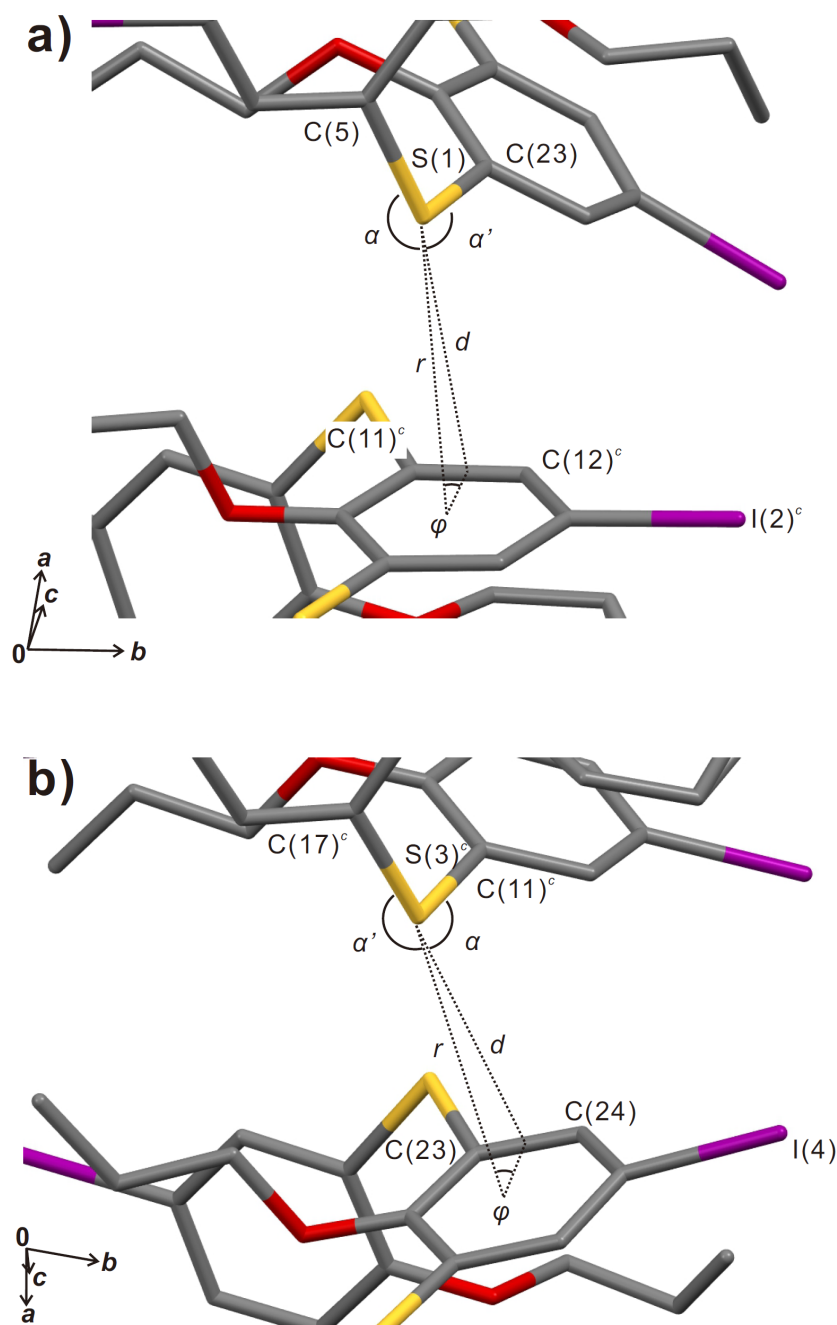

**Supplementary Figure S4** The intermolecular S- $\pi$  interaction between the linking sulfur atom of thiacalixarene molecule and aromatic moiety of thiacalixarene molecule in crystals of **2**. I = purple, S = yellow, O = red, C = gray. All hydrogen atoms have been removed for clarity.

Symmetry operation:  $^c, -1+x, y, z$ .

a)  $r = 3.746 \text{ \AA}$ ,  $d = 3.613 \text{ \AA}$ ,  $\alpha = 98.22^\circ$ ,  $\alpha' = 155.24^\circ$ , and  $\varphi = 74.36^\circ$ .

b)  $r = 3.782 \text{ \AA}$ ,  $d = 3.636 \text{ \AA}$ ,  $\alpha = 96.77^\circ$ ,  $\alpha' = 159.60^\circ$ , and  $\varphi = 73.85^\circ$ .

The parameter values of  $r$ ,  $d$ ,  $\alpha$ ,  $\alpha'$ , and  $\varphi$  lie in the allowable range of S- $\pi$  interactions.<sup>S1</sup>

## Reference

S1 C. -Q. Wan, J. Han and C. W. M. Thomas, *New J. Chem.*, 2009, **33**, 707–712

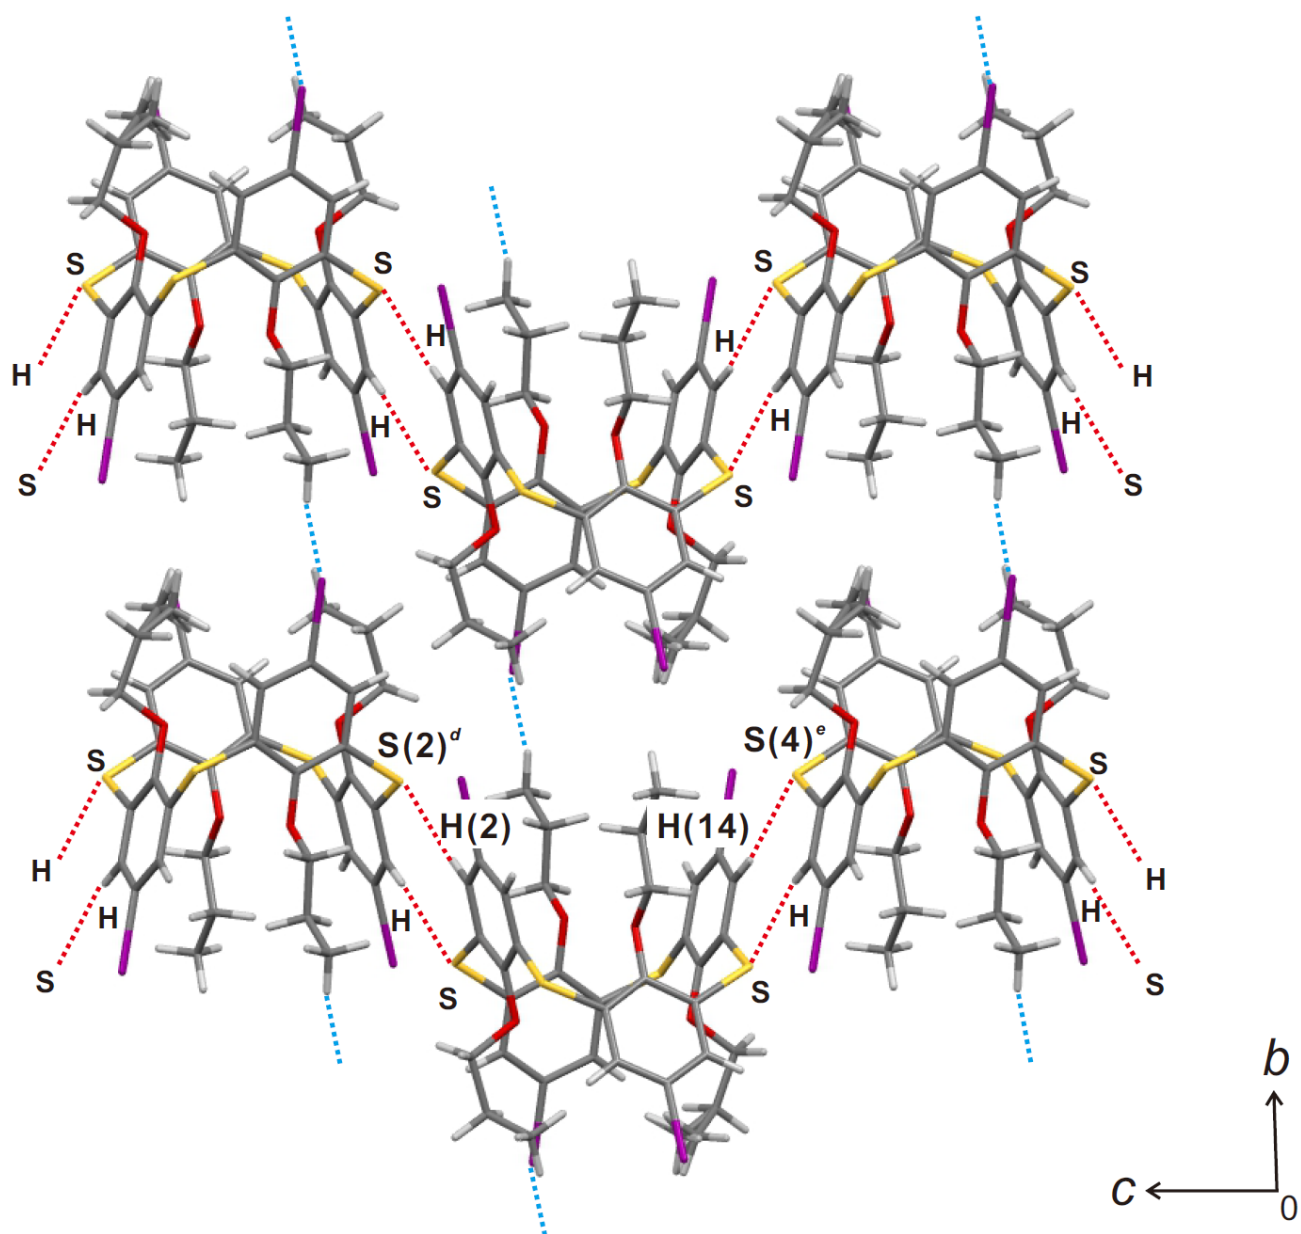

**Supplementary Figure S5** Stick diagram showing hydrogen bonding (red dotted lines) and CH...I interactions (light-blue dotted lines) in crystal structure of **2**, viewed along the [011] plane. Symmetry operations:  $d$ ,  $2-x, -y, 1-z$ ;  $e$ ,  $1-x, -y, 2-z$ .

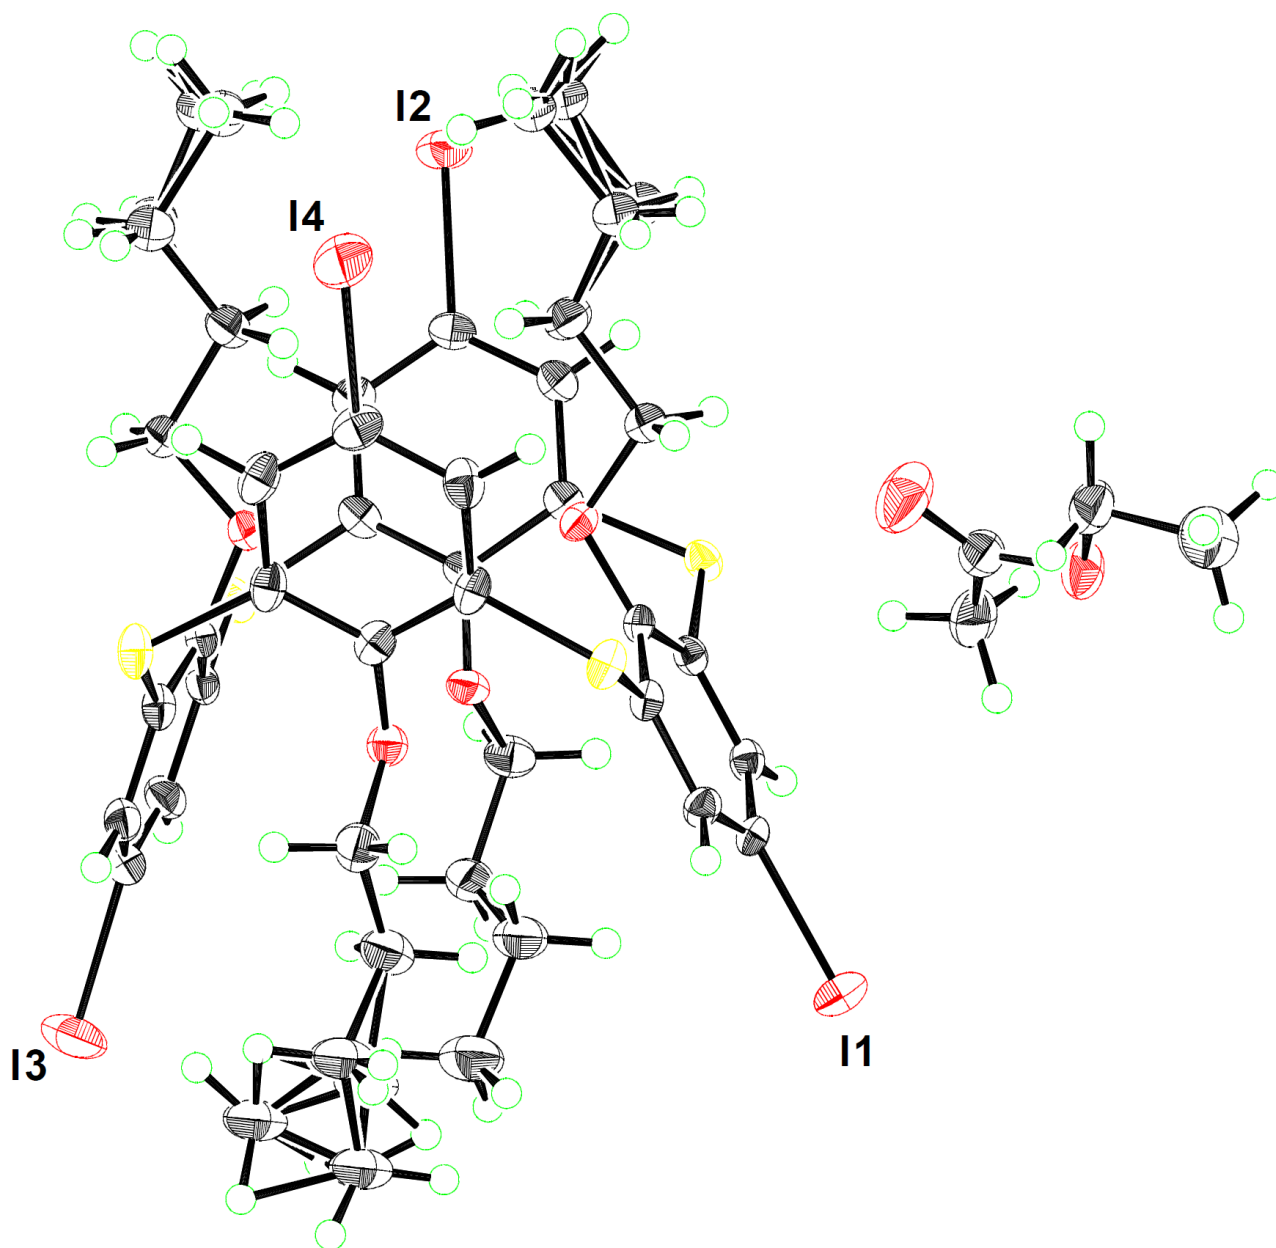

**Supplementary Figure S6** The ORTEP diagram of the asymmetric unit of crystal **3** with thermal ellipsoids at 50% probability.



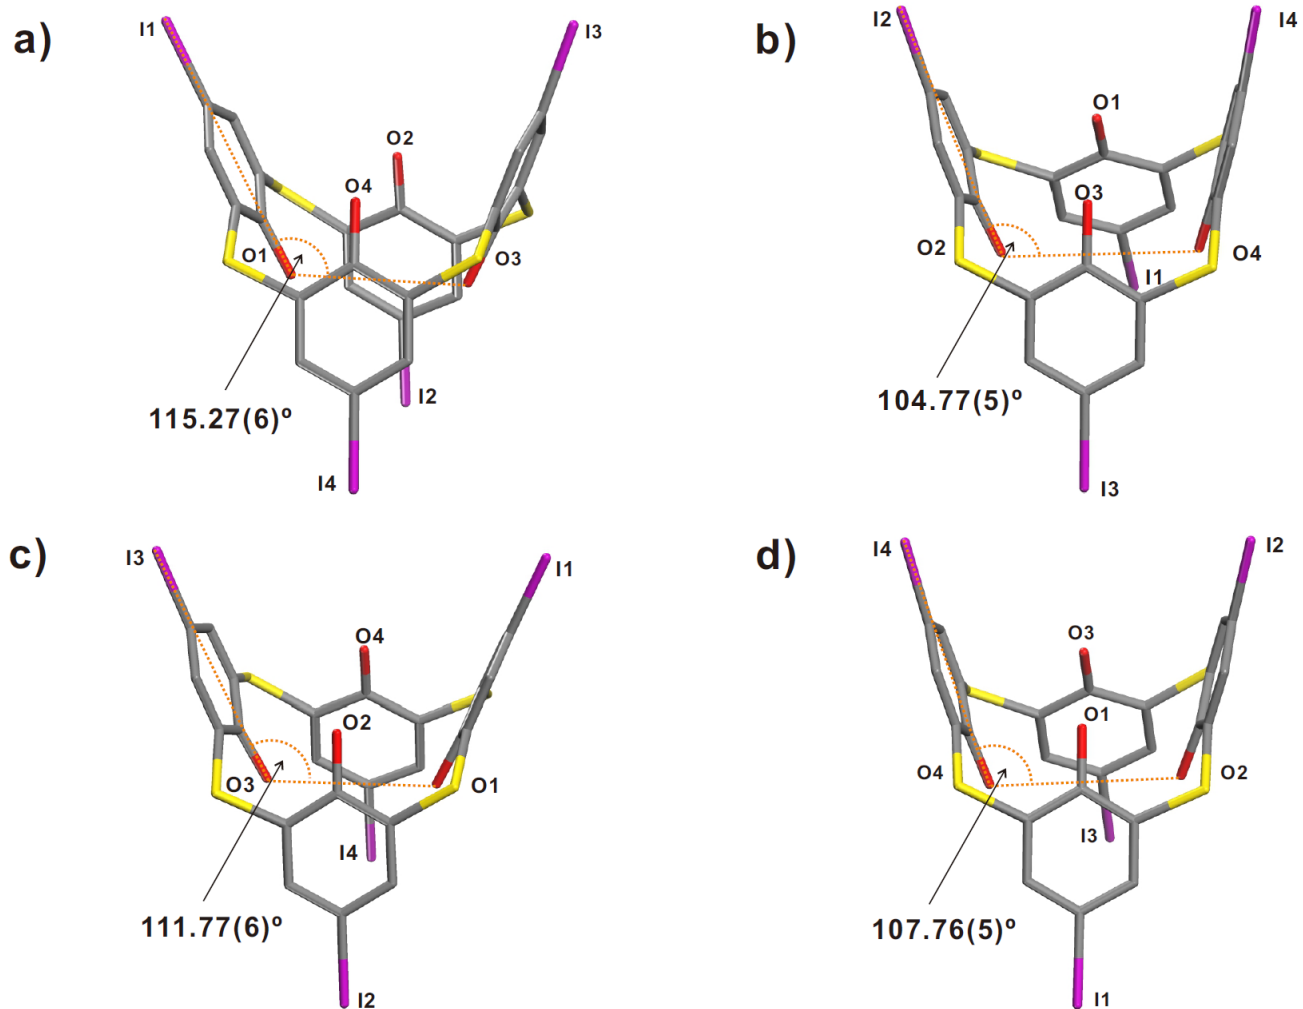

**Supplementary Figure S7** A comparison of each angle in the molecular structure of **3**. In a)–d) hydrogen atoms and the propyl groups have been removed for clarity. I = purple, S = yellow, O = red, C = gray. Selected bond angles: a) I(1)–O(1)–O(3)  $115.27(6)^\circ$ , b) I(2)–O(2)–O(4)  $104.77(5)^\circ$ , c) I(3)–O(3)–O(1)  $111.77(6)^\circ$ , d) I(4)–O(4)–O(2)  $107.76(5)^\circ$ .

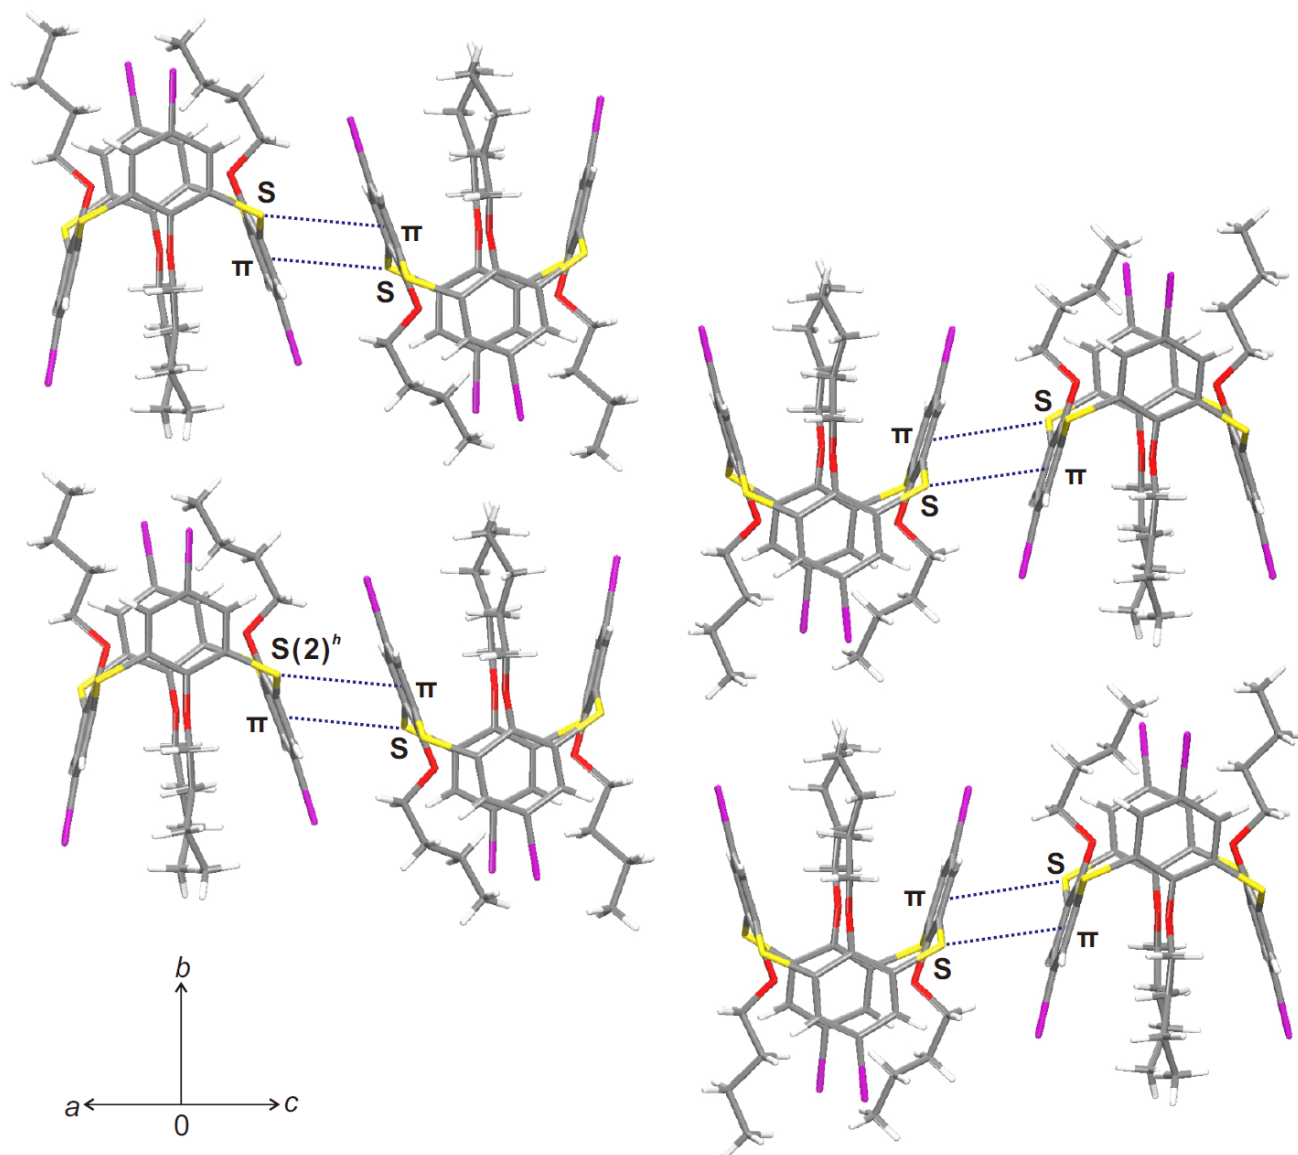

**Supplementary Figure S8** Stick diagram showing S- $\pi$  interactions (blue dotted lines) in the crystal structure of **3**. Disordered moieties have been removed for clarity. Symmetry operations:  $^h$ ,  $2-x$ ,  $2-y$ ,  $1-z$ .

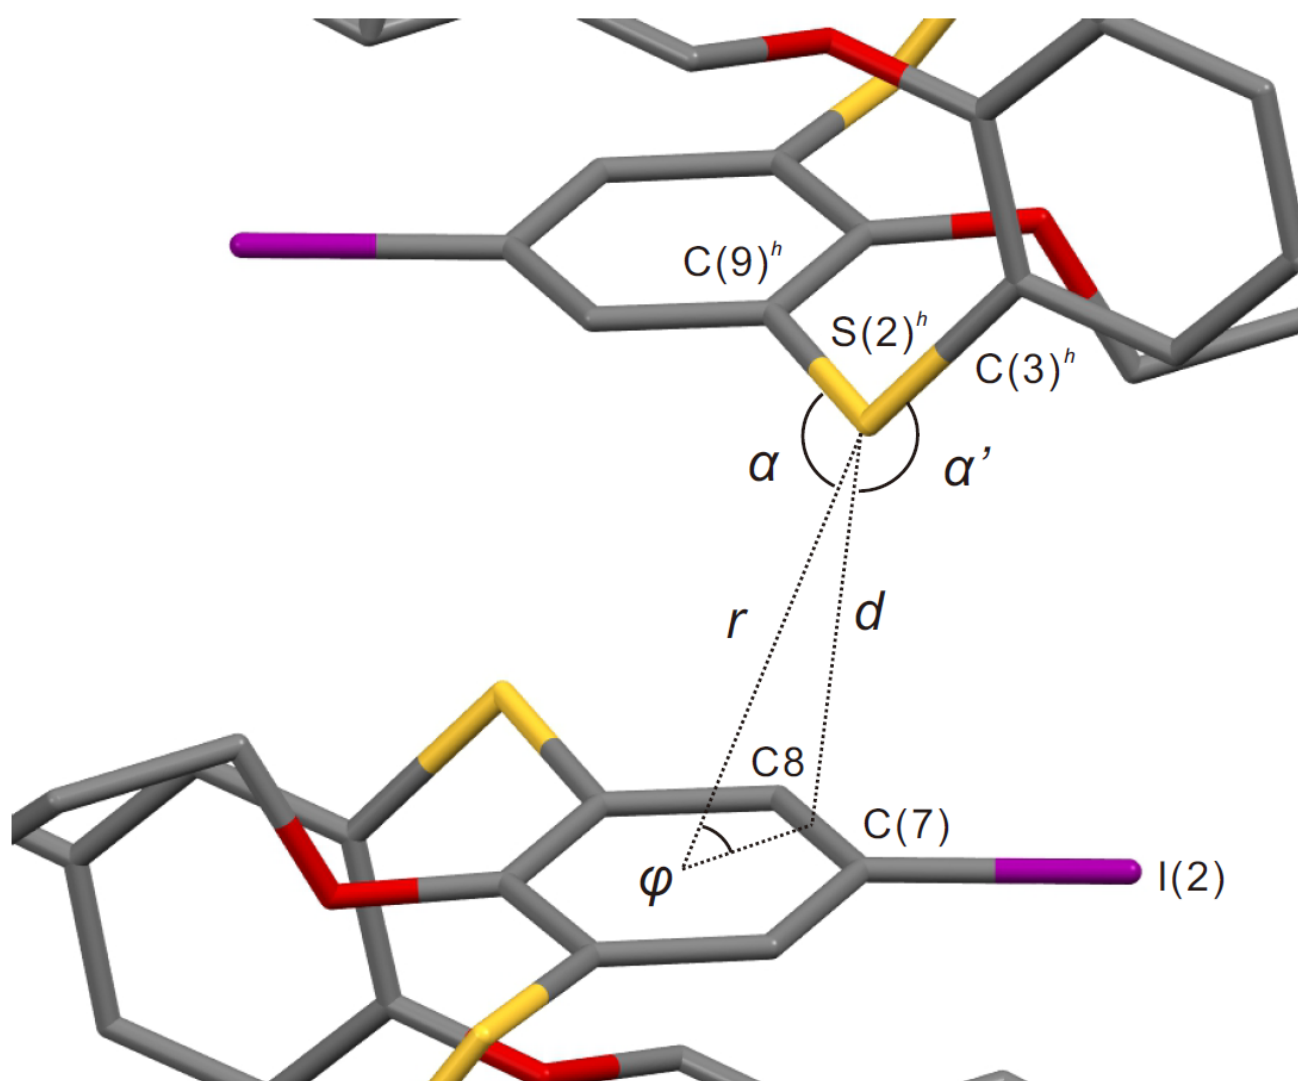

**Supplementary Figure S9** The intermolecular S- $\pi$  interaction between the linking sulfur atom of thiacalixarene molecule and aromatic moiety of thiacalixarene molecule in crystals of **3**. I = purple, S = yellow, O = red, C = gray. All hydrogen atoms have been removed for clarity.

Symmetry operation:  $^h, 2-x, 2-y, 1-z$ .

$r = 3.928 \text{ \AA}$ ,  $d = 3.514 \text{ \AA}$ ,  $\alpha = 96.27^\circ$ ,  $\alpha' = 154.49^\circ$ , and  $\varphi = 61.36^\circ$ .

The parameter values of  $r$ ,  $d$ ,  $\alpha$ ,  $\alpha'$ , and  $\varphi$  lie in the allowable range of S- $\pi$  interactions.<sup>S1</sup>

## Reference

S1 C. -Q. Wan, J. Han and C. W. M. Thomas, *New J. Chem.*, 2009, **33**, 707–712

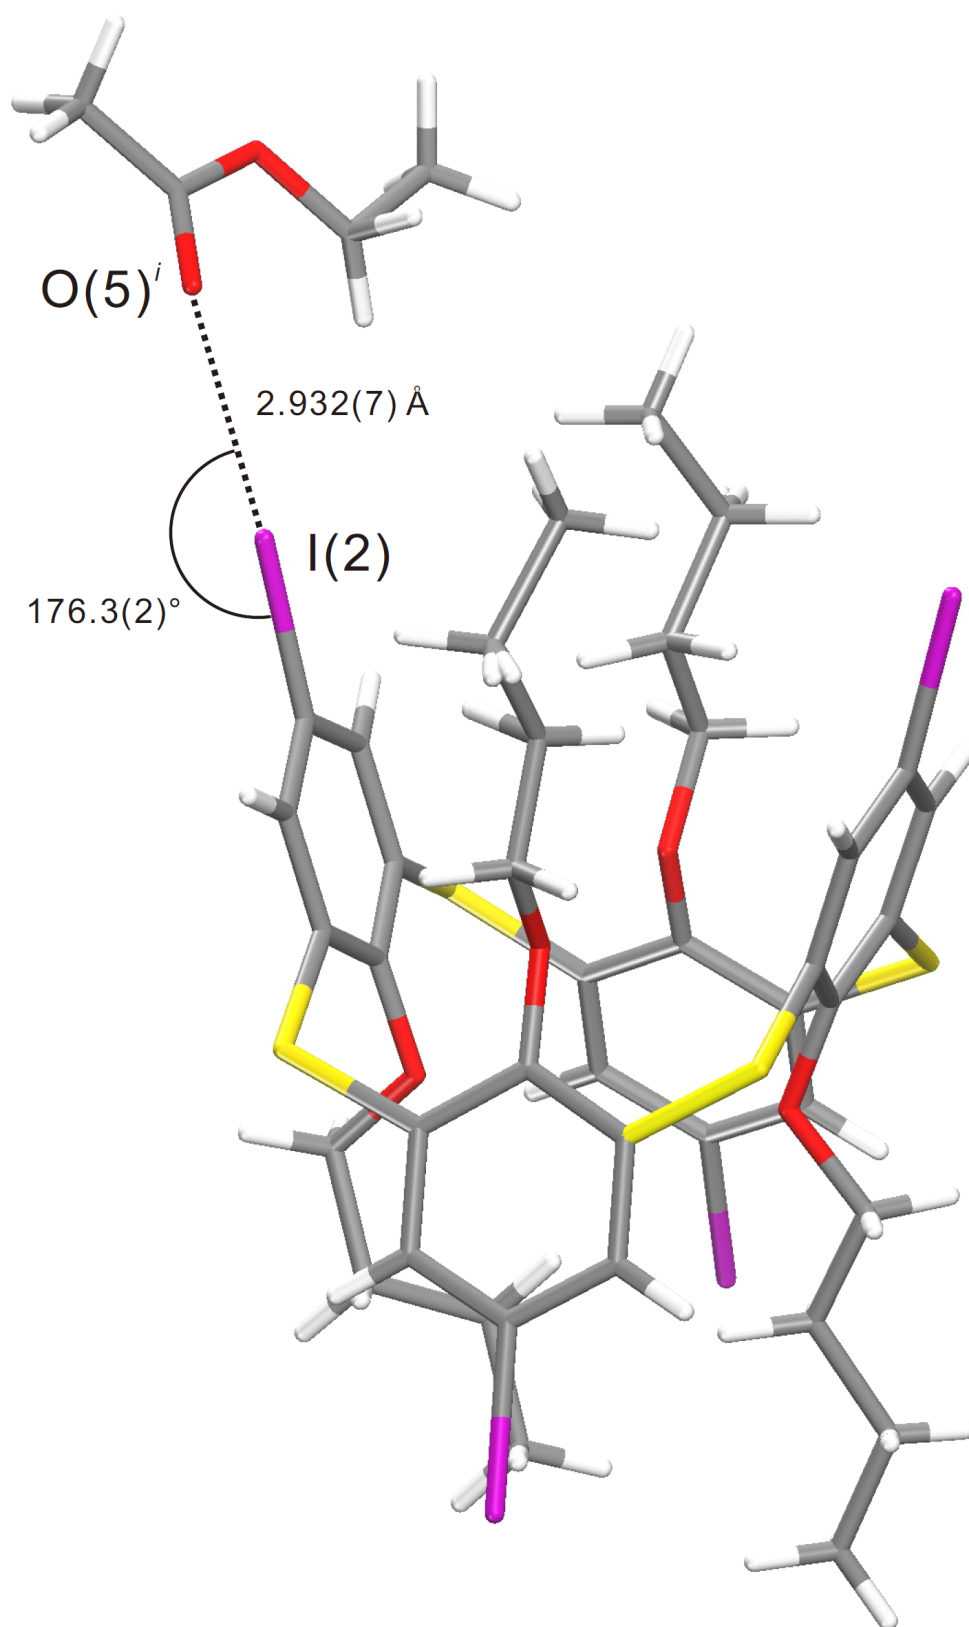

**Supplementary Figure S10** Stick diagram showing O $\cdots$ I halogen bonding (black dotted lines) in crystal structure of **3**. The disordered moieties have been removed for clarity. The O $\cdots$ I distance is 2.932(7) Å. The angle is 176.3(2)°. Symmetry operation:  $i, x, 5/2-y, -1/2+z$ .

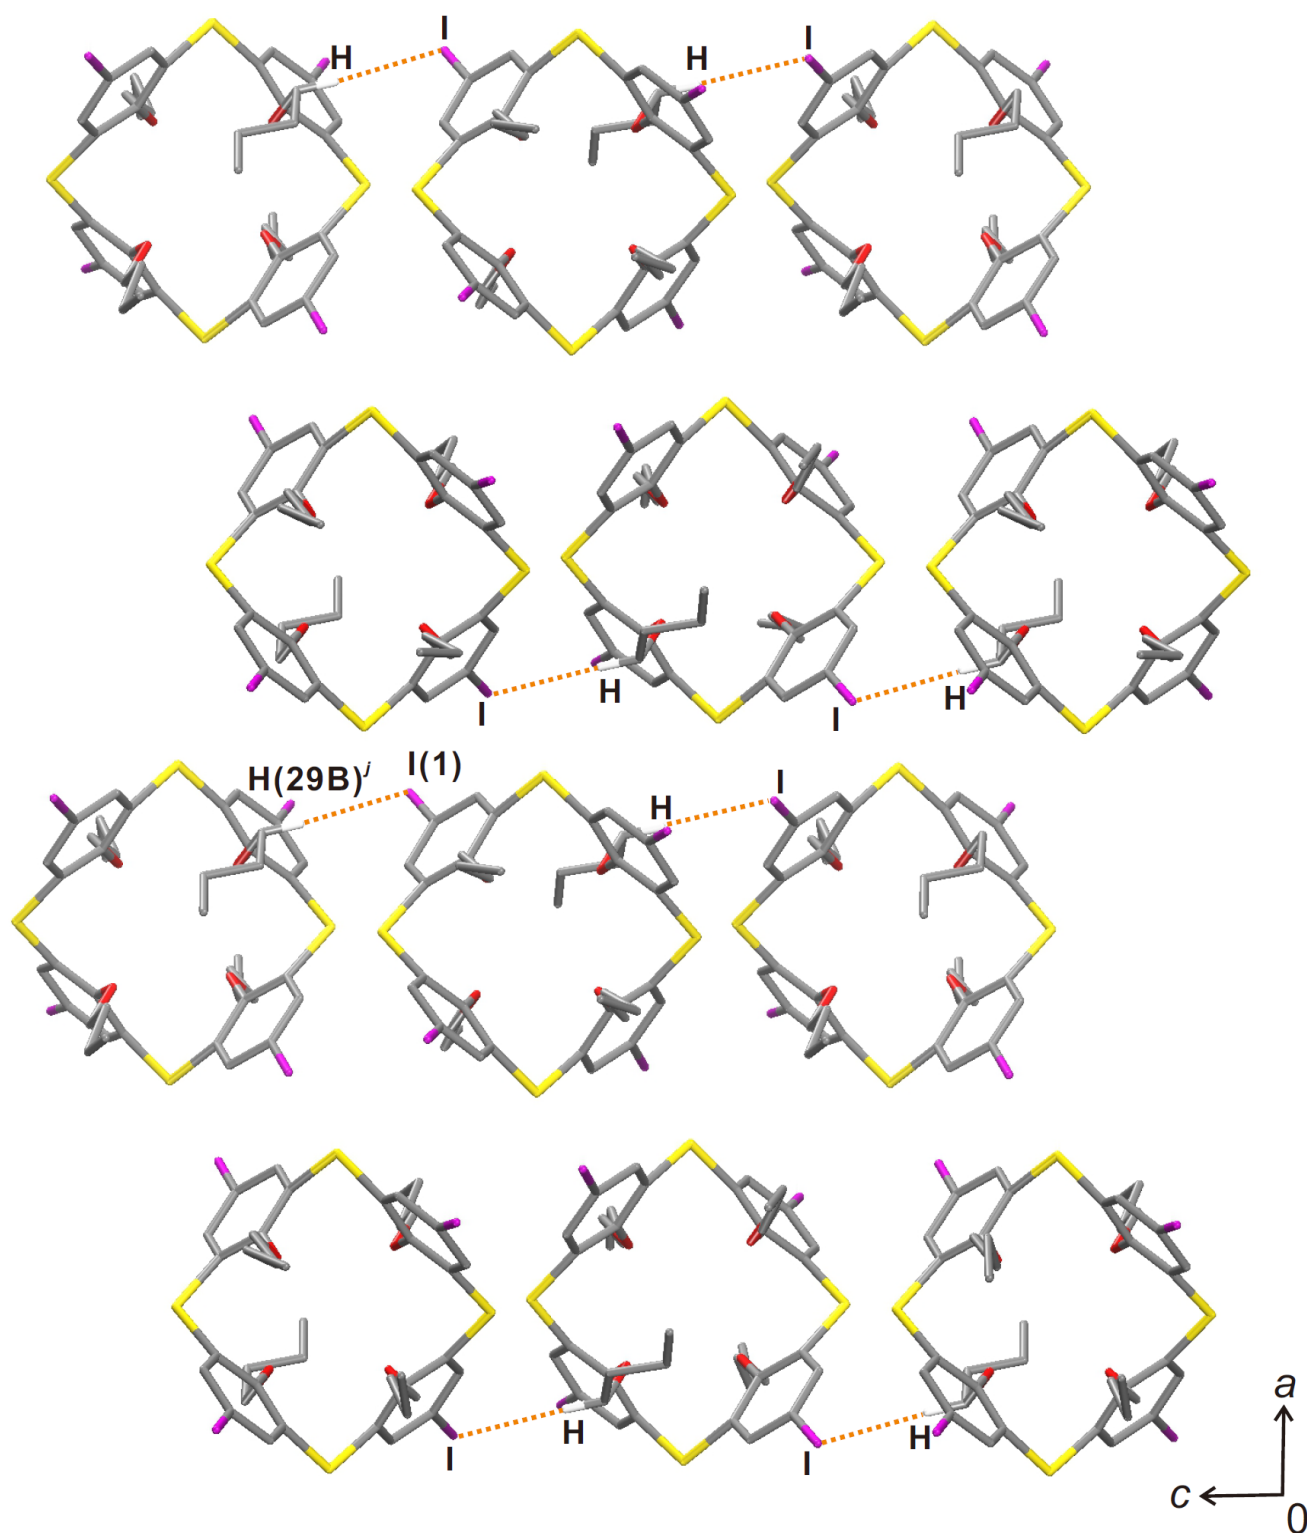

**Supplementary Figure S11** Stick diagram showing C–H⋯I halogen bonding (orange dotted lines) in crystal structure of **3**, viewed along the [101] plane. Almost hydrogen atoms and the disordered moieties have been removed for clarity. The C–H⋯I distance is 3.1568(3) Å. Symmetry operation:  $j$ ,  $2-x$ ,  $-1/2+y$ ,  $3/2-z$ .
